# Supplementary material for: Heavy metal pollution characteristics and health risk assessment of dust fall related to industrial activities in desert steppes
Source: PeerJ. 2021 Nov 3;9:e12430. doi: 10.7717/peerj.12430 (PMC8571961; doi:10.7717/peerj.12430)
Supplement: Supplemental Information 1 — *Corresponding author e-mail: 705484905@qq.com (Nan Mi). [file peerj-09-12430-s001.xlsx]

## Sheet: Sheet1
NO.	Latitude	longitude	Cu	Cd	Cr	Pb	Zn	Mn	Co
1	106.862	38.1534	24.9891	0.539024	46.8894	23.142	380.827	587.495	10.3461
6	106.827	38.136	25.2655	0.577124	45.0206	23.3793	252.674	596.054	10.3731
8	106.83	38.1279	14.8725	0.238965	37.3235	14.1792	112.529	422.622	7.42716
10	106.808	38.1219	30.1166	0.828843	51.0077	26.0881	389.312	593.385	11.6973
12	106.791	38.1201	30.3881	1.03853	54.9672	33.546	321.55	673.385	12.8717
14	106.849	38.1233	25.9262	0.357299	31.638	25.2063	302.076	361.511	8.60629
17	106.886	38.1123	14.5166	0.231496	41.3167	14.4061	91.5269	388.625	7.20604
19	106.908	38.1252	14.3964	0.206014	39.9571	13.4167	122.361	394.036	7.22389
22	106.94	38.1324	15.2217	0.184447	49.0001	13.7363	60.7216	445.119	8.72214
26	106.981	38.1247	11.1391	0.0947152	42.0294	12.0255	50.2829	325.329	6.4034
28	106.999	38.1051	24.7762	0.550839	50.552	20.7067	832.377	623.407	11.2325
29	107.009	38.0987	12.9532	0.119904	40.0592	12.7017	88.0624	388.926	7.25728
33	106.846	38.1128	23.4675	0.361537	32.2428	17.9068	173.278	390.303	8.31192
40	106.841	38.1027	10.028	0.105461	27.5274	12.5407	41.633	314.474	5.54484
42	106.865	38.0911	24.8601	0.630833	45.1769	22.8	437.442	557.206	9.53385
45	106.88	38.0936	30.3774	0.832073	54.4172	32.1106	747.019	629.026	11.6701
47	106.895	38.0912	15.2359	0.155806	45.9029	12.8084	59.6979	430.92	8.26231
48	106.912	38.0877	16.9999	0.317717	39.2564	15.9221	175.921	371.759	7.02721
49	106.919	38.0861	19.7854	0.763557	45.0354	22.2445	269.989	503.002	9.21937
50	106.946	38.0804	26.7192	0.344204	39.7097	18.7281	325.104	398.438	7.48231
52	106.874	38.1291	21.6763	0.32151	27.8994	14.0612	226.206	334.291	5.9354
54	106.931	38.0685	20.8873	0.370058	37.4268	16.3338	170.891	438.123	8.16346
55	106.925	38.062	26.619	0.798605	55.7877	24.5768	592.412	671.018	11.9917
58	106.895	38.0853	14.1506	0.130119	48.9813	12.8531	59.0515	441.617	8.24167
60	106.823	38.112	19.5123	0.389635	28.5972	16.762	170.698	377.249	7.67016
61	106.822	38.1042	15.5628	0.294021	38.9354	17.1267	146.872	377.105	7.62088
62	106.88	38.1356	23.3619	0.573898	48.2278	22.8015	540.378	584.905	10.9066
66	106.811	38.1123	9.86133	0.0933881	32.6776	12.4103	43.4792	333.817	5.89101
68	106.788	38.111	21.0336	0.410989	34.0481	17.3858	215.819	403.813	8.00148
69	106.789	38.1029	18.2048	0.40636	29.7799	12.7673	162.16	348.71	6.44606
70	106.791	38.0986	15.4034	0.343006	37.3837	13.8196	151.073	439.078	7.25365
71	106.796	38.0911	17.9515	0.43357	41.8559	19.6397	250.729	473.693	8.20677
76	106.921	38.1259	13.9932	0.150796	42.4284	13.4574	118.86	405.149	7.63545
A	106.826	38.1198	22.8952	0.203917	21.5872	16.4381	208.046	211.887	6.66604
B	106.848	38.1172	21.656	0.372589	32.9007	21.3117	210.655	361.532	10.1072
C	106.836	38.1198	22.0749	0.303775	27.3172	21.8588	153.732	301.285	9.56952
D	106.815	38.1182	22.972	0.347507	29.1896	16.2533	198.582	336.037	7.22245
